# Supplementary material for: Inhibiting Cyclin-Dependent Kinase 6 by Taurine: Implications in Anticancer Therapeutics
Source: PubMed Central journal article supplement — ACS Omega. 2022 Jul 13;7(29):25844–52. doi: 10.1021/acsomega.2c03479 (PMC9330843; doi:10.1021/acsomega.2c03479), 2022-07-13
Supplement: ao2c03479_si_001.pdf [file ao2c03479_si_001.pdf]

*Running Head: Inhibition of CDK6 by Taurine*

## **Inhibiting cyclin-dependent kinase 6 by Taurine: Implications in anti-cancer therapeutics**

Mohd Yousuf<sup>1</sup>, Anas Shamsi<sup>2</sup>, Taj Mohammad<sup>2</sup>, Naved Azum<sup>3,4</sup>, Sulaiman Y. M. Alfai<sup>4</sup>, Abdullah M. Asiri<sup>3,4</sup>, Abdelbaset Mohamed Elsbali<sup>5</sup>, Asimul Islam<sup>2</sup>, Md. Imtaiyaz Hassan<sup>2,\*</sup>, and Qazi Mohd Rizwanul Haque<sup>1,\*</sup>

<sup>1</sup>*Department of Biosciences, Jamia Millia Islamia, Jamia Nagar, New Delhi, INDIA.*

<sup>2</sup>*Centre for Interdisciplinary Research in Basic Sciences, Jamia Millia Islamia, Jamia Nagar, New Delhi 110025, INDIA.*

<sup>3</sup>*Center of Excellence for Advanced Materials Research, King Abdulaziz University, Jeddah 21589, Saudi Arabia.*

<sup>4</sup>*Chemistry Department, Faculty of Science, King Abdulaziz University, Jeddah 21589, Saudi Arabia.*

<sup>5</sup>*Clinical Laboratory Science, College of Applied Sciences-Qurayyat, Jouf University, Saudi Arabia.*

***\*To whom all correspondence should be addressed,***

**Md. Imtaiyaz Hassan, Ph.D., FRSB, FRSC.**

E-mail: [mihassan@jmi.ac.in](mailto:mihassan@jmi.ac.in)

**Qazi Mohd Rizwanul Haque**

E-mail: [ghaque@jmi.ac.in](mailto:ghaque@jmi.ac.in)

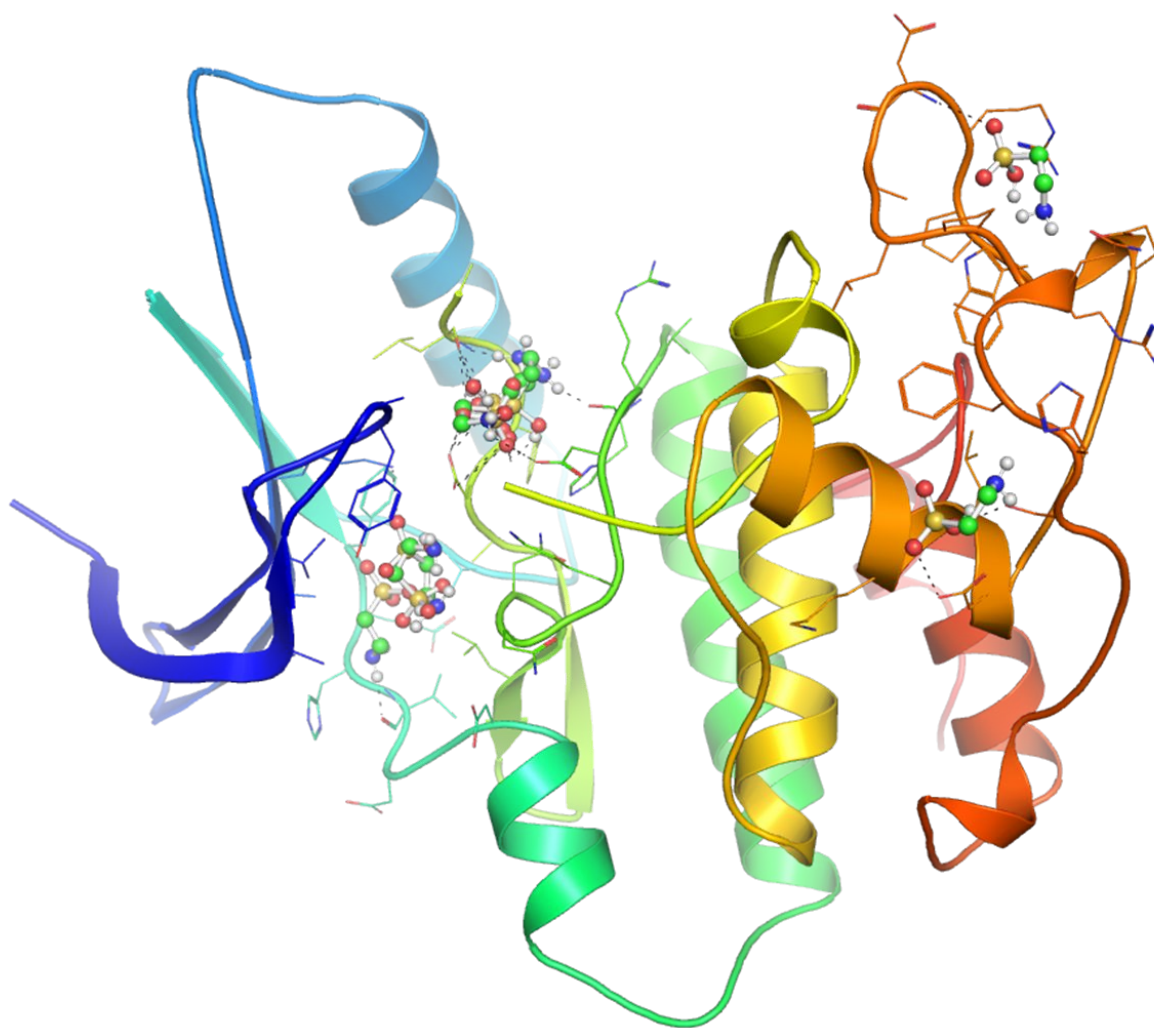

*Figure S1: Multiple binding sites of taurine on CDK6.*
